# Supplementary material for: Assessment of glyphosate and its metabolites’ residue concentrations in cultured African Catfish offered for sale in selected markets in Ibadan, Oyo State, Nigeria
Source: Frontiers journal article supplement (doi:10.3389/ftox.2023.1250137), 2023-11-02
Supplement: Image_4.pdf [file Image_4.pdf]

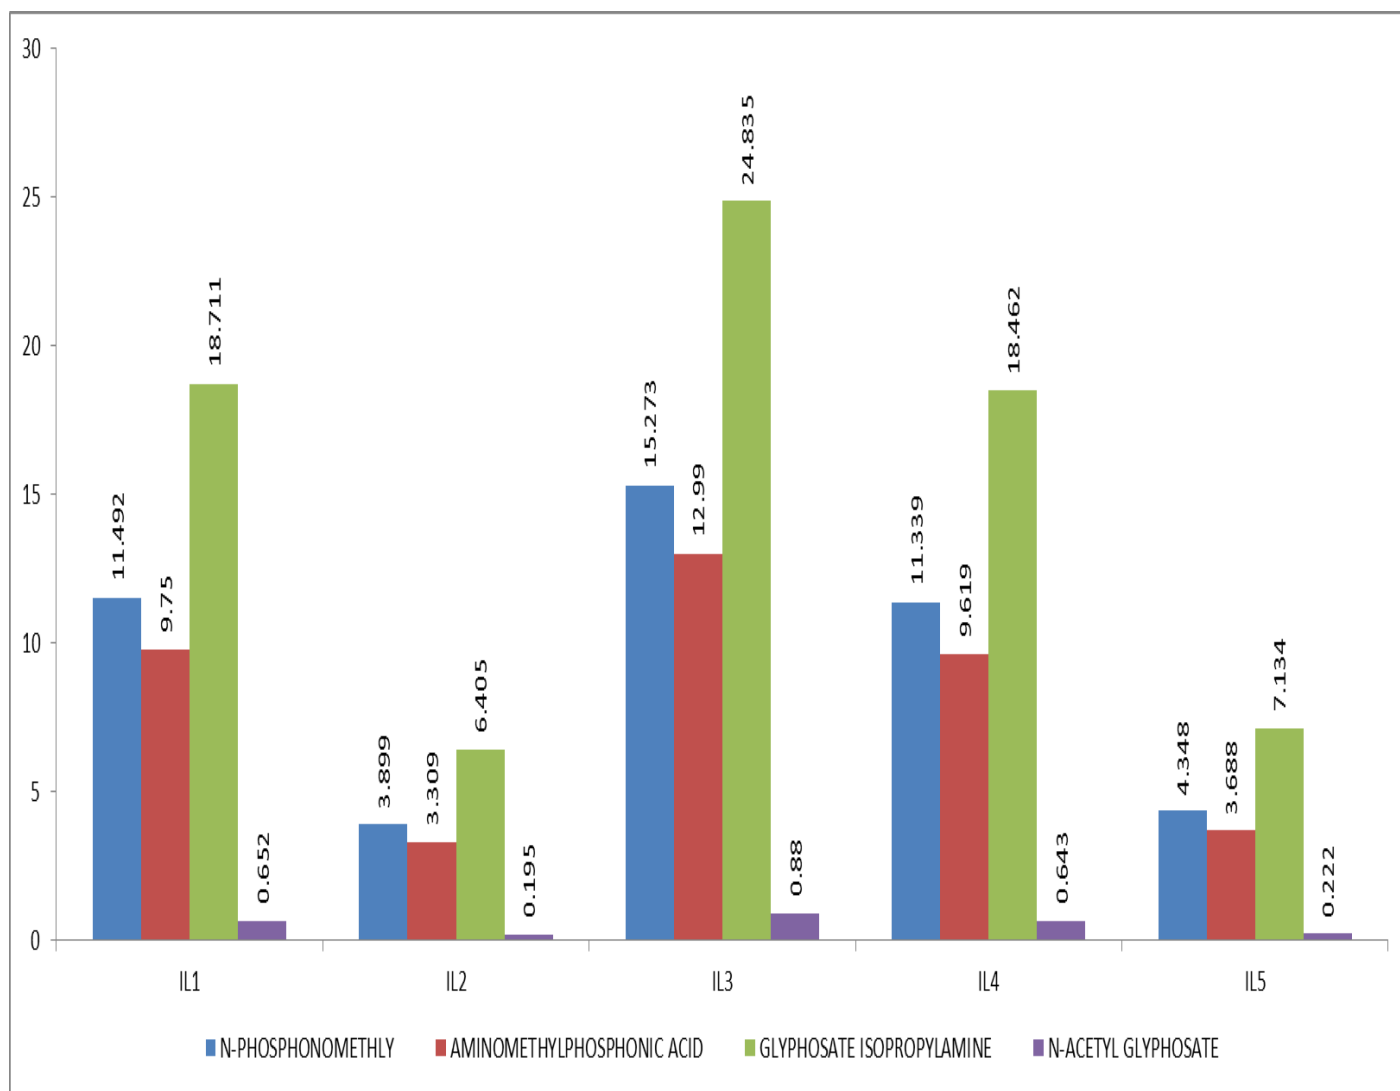

**Figure 4. Residues concentrations (mg/L) of Glyphosate and its metabolites present in the liver of Catfish offered for sale in Iwo road Fish Market**
